# Supplementary material for: Secondary organic aerosol and organic nitrogen yields from the nitrate radical (NO 3 ) oxidation of alpha-pinene from various RO 2 fates
Source: Copernicus journal article supplement (doi:10.5194/acp-22-1467-2022), 2022-01-31
Supplement: Supplementary file 1 [file acp-22-1467-2022-supplement.pdf]

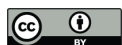

*Supplement of*

## **Secondary organic aerosol and organic nitrogen yields from the nitrate radical (NO<sub>3</sub>) oxidation of alpha-pinene from various RO<sub>2</sub> fates**

**Kelvin H. Bates et al.**

*Correspondence to:* Tran B. Nguyen (tbn@ucdavis.edu)

The copyright of individual parts of the supplement might differ from the article licence.

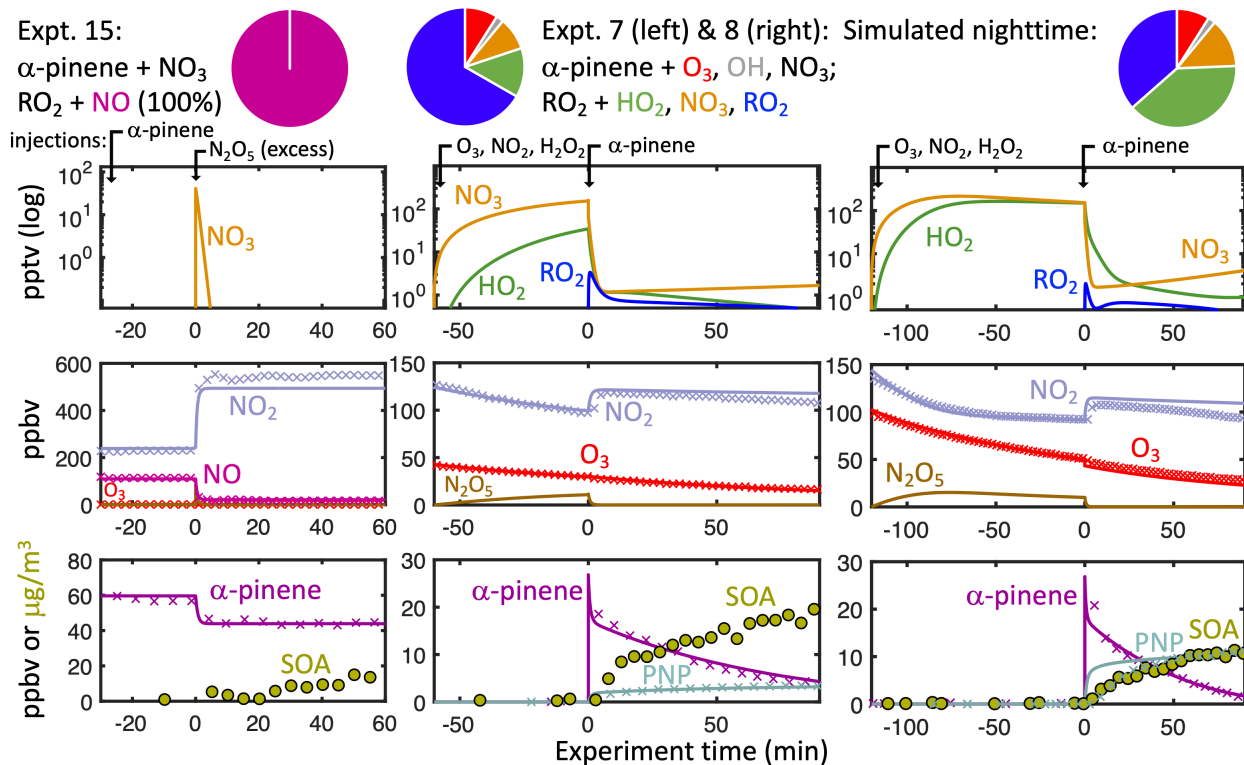

**Figure S1.** Modelled (solid lines) and measured (points) concentrations of key reactive species and products in three example chamber experiments. Timings of chamber injections are demarcated at top. Experiment time of 0 corresponds to the beginning of  $\alpha$ -pinene oxidation. Pie charts show the percent contribution of each  $\alpha$ -pinene oxidative pathway ( $\alpha$ -pinene +  $\text{O}_3$  in red,  $\alpha$ -pinene +  $\text{OH}$  in grey and  $\alpha$ -pinene +  $\text{NO}_3$  speciated by subsequent  $\text{RO}_2$  reaction partner: pink for  $\text{NO}$ , orange for  $\text{NO}_3$ , blue for  $\text{RO}_2$ , green for  $\text{HO}_2$ ).

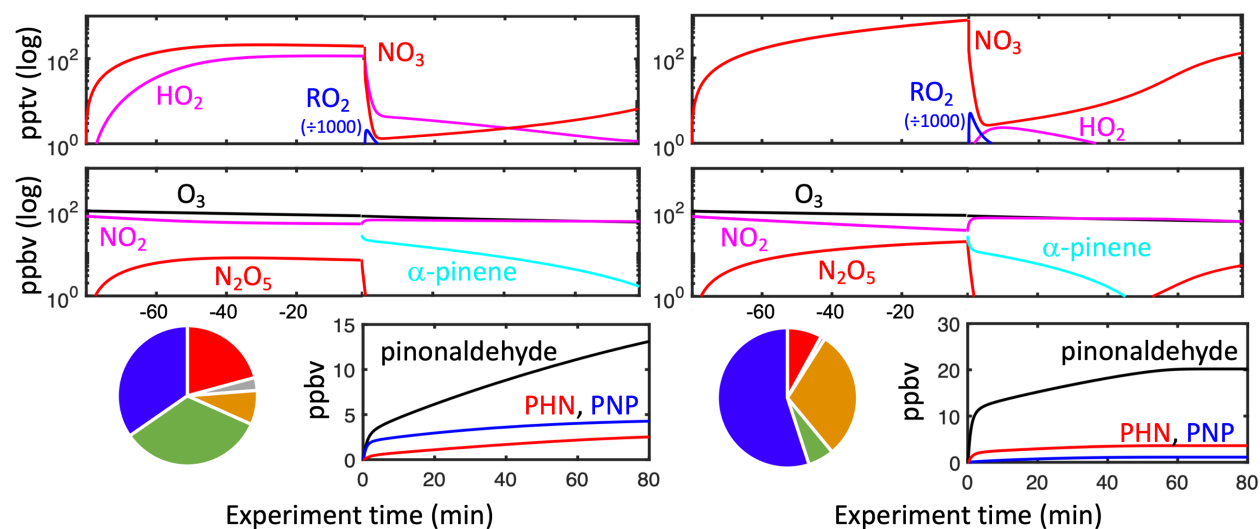

**Figure S2.** Modeled concentrations of key reactive species (top) and contributions of reactive pathways (bottom) in an example ‘simulated nighttime’ experiment with (left) and without (right) inclusion of the  $\text{NO}_3 + \text{H}_2\text{O}_2$  reaction to produce  $\text{HO}_2$ . Experiment time of 0 corresponds to the  $\alpha$ -pinene injection and beginning of its oxidation. Pie charts show the percent contribution of each  $\alpha$ -pinene oxidative pathway ( $\alpha$ -pinene+ $\text{O}_3$  in red,  $\alpha$ -pinene+OH in grey and  $\alpha$ -pinene+ $\text{NO}_3$  speciated by subsequent  $\text{RO}_2$  reaction partner: orange for  $\text{NO}_3$ , blue for  $\text{RO}_2$ , green for  $\text{HO}_2$ ). Without the  $\text{NO}_3 + \text{H}_2\text{O}_2$  reaction, the  $n\text{RO}_2 + \text{HO}_2$  pathway only contributes 6% of the total  $\alpha$ -pinene fate, which is incompatible with our high ( $\sim 22\%$ ) measured yields of PNP. In our kinetic model, we use a rate constant of  $k_{\text{NO}_3+\text{H}_2\text{O}_2} = 1.1 \times 10^{-16} \text{ cm}^3 \text{ molecule}^{-1} \text{ s}^{-1}$ , estimated from  $(k_{\text{NO}_3+\text{CH}_2\text{O}} / k_{\text{OH}+\text{CH}_2\text{O}}) \times k_{\text{OH}+\text{H}_2\text{O}_2}$ . This is well below the upper limit of  $2 \times 10^{-15} \text{ cm}^3 \text{ molecule}^{-1} \text{ s}^{-1}$  estimated by Burrows, Tyndall, & Moortgat.<sup>1</sup>

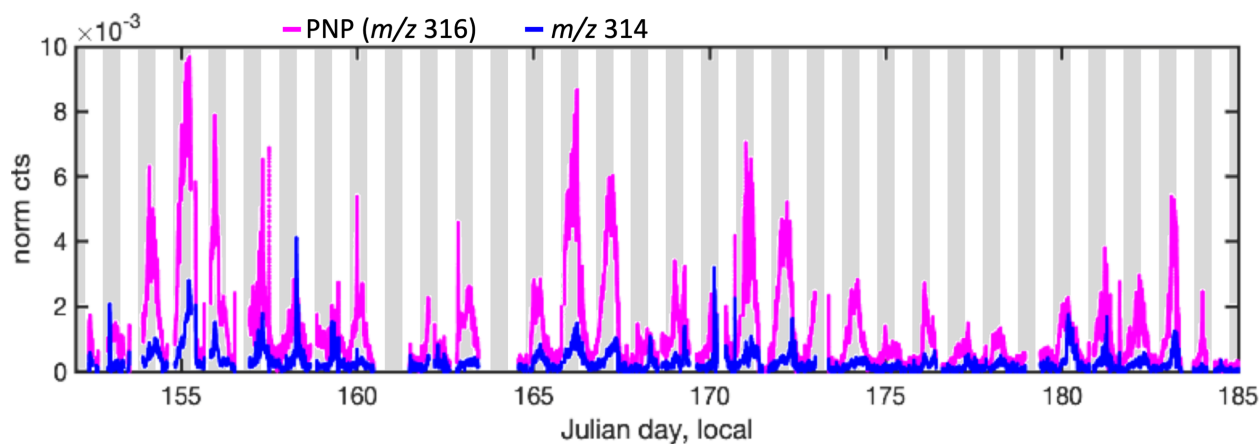

**Figure S3.** Select gas-phase organonitrates observed by  $\text{CF}_3\text{O}^-$  CIMS during the Southern Oxidant and Aerosol Study (SOAS), including PNP ( $m/z$  316) and an unknown compound at  $m/z$  314. Both compounds were had similar diurnal cycles at SOAS (peaking at night), and were also observed during ‘simulated nighttime’ experiments in this work (Fig. 4)

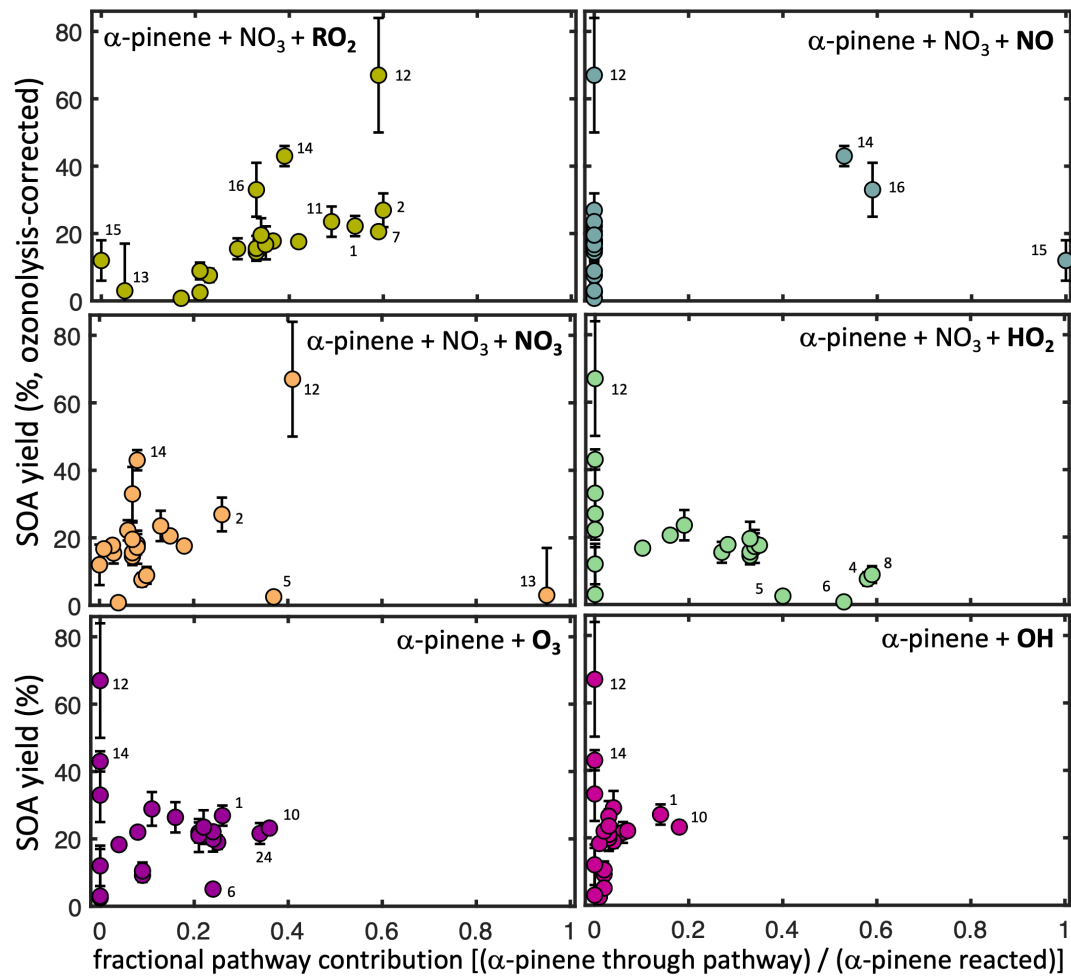

**Figure S4.** Measured SOA yields from chamber experiments plotted against modeled contributions of each reactive pathway. Select points are labeled with their experiment numbers from **Tables 1 & 2**. Error bars denote uncertainty from SMPS measurements.

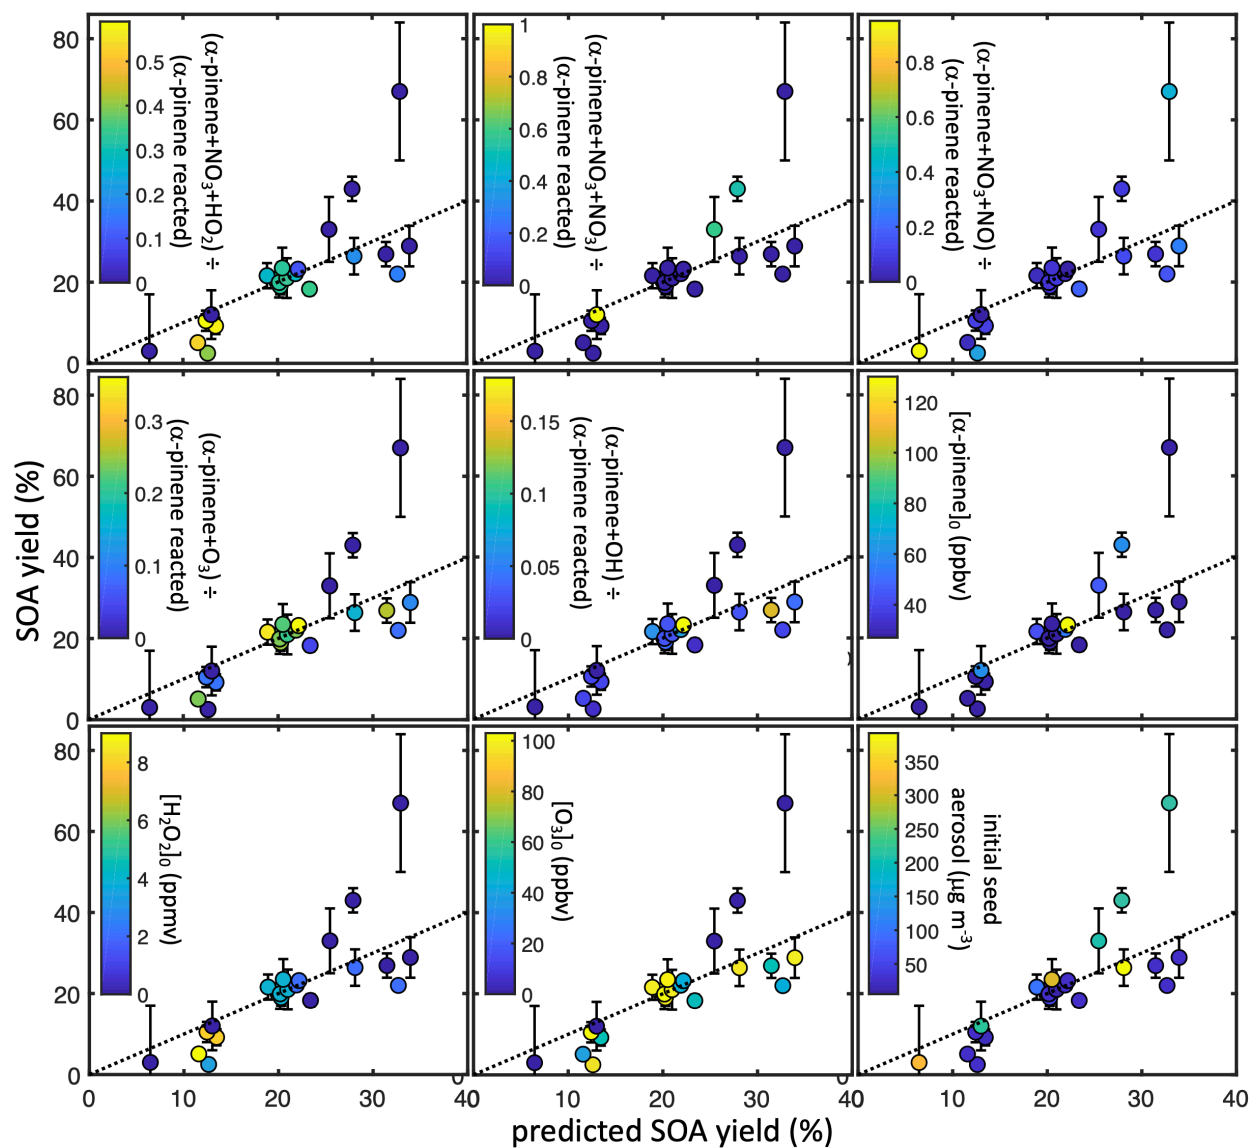

**Figure S5.** Measured (non-ozonolysis-corrected) SOA mass yields from each experiment as a function of the predicted SOA yield from the sum of each pathway contribution, with points colored by various experimental or modelled parameters. Error bars denote uncertainty from SMPS measurements.

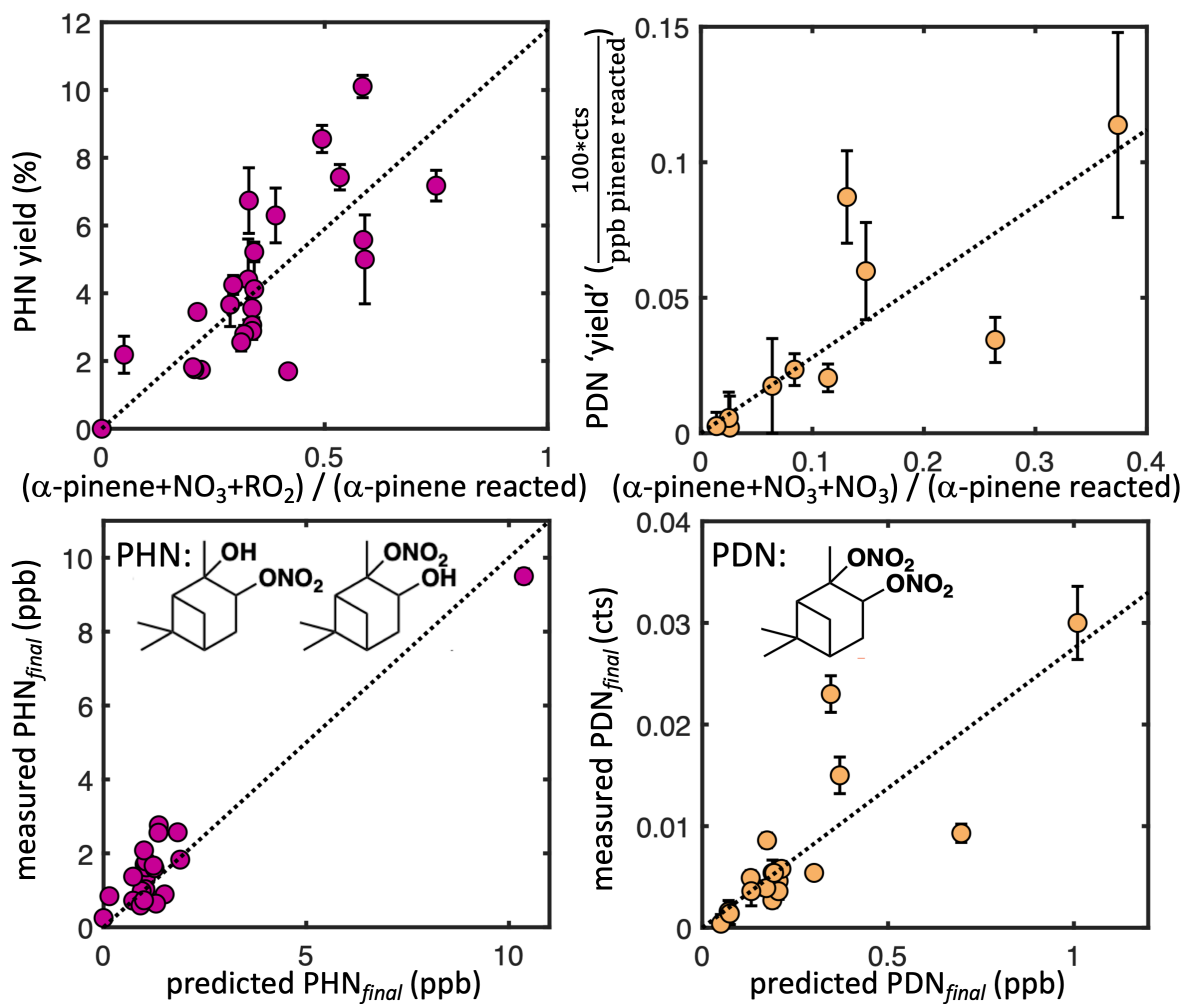

**Figure S6.** Measured yields of  $\alpha$ -pinene hydroxynitrate (PHN, left, a product of  $\text{RO}_2 + \text{RO}_2$  chemistry) and  $\alpha$ -pinene dinitrate (PDN, right, a product of  $\text{RO}_2 + \text{NO}$  and/or  $\text{RO}_2 + \text{NO}_3$  chemistry) as a function of the modeled contribution of their formation pathway (top) and plotted against the yields predicted by the simple kinetic model. For PDN, the CIMS cannot be properly calibrated due to a lack of standards or calibrant analogs, so the measurement values are reported as normalized CIMS counts. Dotted lines denote ordinary least squares regressions, constrained to pass through the origin, with  $R^2$  of (clockwise from top left) 0.58, 0.66, 0.67, and 0.91.

Table S1 provides additional details on the ozonolysis control experiments performed individually for each simulated nighttime experiment described in the main text. Control experiments were initialized with the same  $[H_2O_2]_0$  and seed aerosol loadings as in the main experiments (as listed in **Tables 1 & 2**), but with lower  $[O_3]_0$  designed to approximately match the  $[O_3]_0$  value at the time when pinene was injected in the main experiment (at which point it had diminished from the value listed in **Table 1** due to reactions with the other inorganic reactants present). Reported SOA mass yields in **Table S1** are averages over the course of the experiment. In preparing the “ozonolysis-adjusted” SOA mass yields in **Table 2**, we subtracted instantaneous SOA yields from each time point in the ozonolysis control experiment from the corresponding time point in the main experiment (weighted by the modeled ozonolysis contribution to the overall  $\alpha$ -pinene reactivity).

**Table S1.** Initial conditions and SOA yields for ozonolysis control experiments

| Expt #<br>( <b>Tab.</b><br><b>1 &amp; 2</b> ) | $\alpha$ -<br>pinene<br>(ppb) | $H_2O_2$<br>(ppm) | $O_3$<br>(ppb) | seed<br>mass<br>( $\mu\text{g}/\text{m}^3$ ) | SOA<br>mass<br>yield (%) | Ozonolysis contri-<br>bution to main<br>expt (%; modelled) | SOA mass yield<br>to subtract from<br>main expt (%) |
|-----------------------------------------------|-------------------------------|-------------------|----------------|----------------------------------------------|--------------------------|------------------------------------------------------------|-----------------------------------------------------|
| 1                                             | 27                            | 0                 | 50             | 23.4                                         | 20.4                     | 27                                                         | 5.5                                                 |
| 2                                             | 27                            | 0                 | 88             | 23.2                                         | 18.3                     | 11                                                         | 2.0                                                 |
| 3                                             | 27                            | 4                 | 35             | 23.8                                         | 20.8                     | 5                                                          | 1.0                                                 |
| 4                                             | 27                            | 8                 | 35             | 23.7                                         | 19.3                     | 9                                                          | 1.7                                                 |
| 5                                             | 27                            | 3.5               | 41             | 23.5                                         | 4.8                      | 1                                                          | 0.05                                                |
| 6                                             | 27                            | 9                 | 27             | 25.3                                         | 24.7                     | 24                                                         | 5.9                                                 |
| 7                                             | 27                            | 2                 | 30             | 24.2                                         | 21.3                     | 8                                                          | 1.7                                                 |
| 8                                             | 27                            | 8                 | 55             | 27.7                                         | 17.7                     | 9                                                          | 1.6                                                 |
| 9                                             | 54                            | 2                 | 34             | 24.8                                         | 11.9                     | 24                                                         | 2.9                                                 |
| 10                                            | 130                           | 2                 | 32             | 27.3                                         | 12.4                     | 36                                                         | 4.5                                                 |
| 11                                            | 27                            | 2                 | 116            | 253                                          | 18.3                     | 13                                                         | 2.4                                                 |
| 17                                            | 27                            | 4                 | 87             | 0                                            | 18.0                     | 21                                                         | 3.8                                                 |
| 18                                            | 27                            | 4                 | 78             | 2.5                                          | 20.4                     | 22                                                         | 4.5                                                 |
| 19                                            | 27                            | 4                 | 79             | 2.5                                          | 19.1                     | 21                                                         | 4.0                                                 |
| 20                                            | 27                            | 4                 | 82             | 5.3                                          | 21.1                     | 20                                                         | 4.2                                                 |
| 21                                            | 27                            | 4                 | 82             | 10.8                                         | 21.4                     | 20                                                         | 4.3                                                 |
| 22                                            | 27                            | 4                 | 86             | 24.3                                         | 22.9                     | 23                                                         | 5.3                                                 |
| 23                                            | 27                            | 4                 | 80             | 57.2                                         | 21.4                     | 23                                                         | 4.9                                                 |
| 24                                            | 42                            | 4                 | 79             | 101                                          | 16.7                     | 34                                                         | 5.7                                                 |
| 25                                            | 27                            | 4                 | 105            | 245                                          | 17.1                     | 21                                                         | 3.6                                                 |

**Table S2.** Masses of proposed  $\alpha$ -pinene RO<sub>2</sub> dimers as observed in HRMS analysis of SOA from filters collected during experiments 26 ( $n$ RO<sub>2</sub> +  $n$ RO<sub>2</sub>) and 27 (simulated nighttime).<sup>a</sup>

| Positive <sup>b</sup>                       |                                                                | $n$ RO <sub>2</sub> $\alpha$                    | $n$ RO <sub>2</sub> $\beta$                     | $n$ RO <sub>2</sub> $\chi$                      | $n$ RO <sub>2</sub> $\delta$                   | $n$ RO <sub>2</sub> $\epsilon$                                 | $on$ RO <sub>2</sub> 1                          | $on$ RO <sub>2</sub> 2                         | $o_3$ RO <sub>2</sub> i                        | $o_3$ RO <sub>2</sub> ii                       | $o_3$ RO <sub>2</sub> iii                      |
|---------------------------------------------|----------------------------------------------------------------|-------------------------------------------------|-------------------------------------------------|-------------------------------------------------|------------------------------------------------|----------------------------------------------------------------|-------------------------------------------------|------------------------------------------------|------------------------------------------------|------------------------------------------------|------------------------------------------------|
|                                             |                                                                | C <sub>10</sub> H <sub>16</sub> NO <sub>5</sub> | C <sub>10</sub> H <sub>16</sub> NO <sub>6</sub> | C <sub>10</sub> H <sub>16</sub> NO <sub>7</sub> | C <sub>7</sub> H <sub>10</sub> NO <sub>7</sub> | C <sub>10</sub> H <sub>15</sub> N <sub>2</sub> O <sub>10</sub> | C <sub>10</sub> H <sub>17</sub> O <sub>5</sub>  | C <sub>10</sub> H <sub>17</sub> O <sub>7</sub> | C <sub>10</sub> H <sub>15</sub> O <sub>4</sub> | C <sub>10</sub> H <sub>15</sub> O <sub>6</sub> | C <sub>10</sub> H <sub>15</sub> O <sub>8</sub> |
| $n$ RO <sub>2</sub> $\alpha$                | C <sub>10</sub> H <sub>16</sub> NO <sub>5</sub>                | *357.204 <sup>c</sup>                           | *467.200                                        | *483.195                                        | *441.148                                       | *544.175                                                       | 438.210                                         | *470.200                                       | 420.199                                        | 452.189                                        | 484.179                                        |
| $n$ RO <sub>2</sub> $\beta$                 | C <sub>10</sub> H <sub>16</sub> NO <sub>6</sub>                | *467.200                                        | *483.195                                        | *499.190                                        | *457.143                                       | *560.170                                                       | *454.205                                        | *486.195                                       | 436.194                                        | *468.184                                       | *500.174                                       |
| $n$ RO <sub>2</sub> $\chi$                  | C <sub>10</sub> H <sub>16</sub> NO <sub>7</sub>                | *483.195                                        | *499.190                                        | *515.185                                        | 473.138                                        | 576.165                                                        | *470.200                                        | 502.190                                        | 452.189                                        | 484.179                                        | 516.169                                        |
| $n$ RO <sub>2</sub> $\delta$                | C <sub>7</sub> H <sub>10</sub> NO <sub>7</sub>                 | *441.148                                        | *457.143                                        | 473.138                                         | 431.091                                        | 534.118                                                        | 428.153                                         | 460.143                                        | 410.142                                        | 442.132                                        | 474.122                                        |
| $n$ RO <sub>2</sub> $\epsilon$ <sup>d</sup> | C <sub>10</sub> H <sub>15</sub> N <sub>2</sub> O <sub>10</sub> | *544.175                                        | *560.170                                        | 576.165                                         | 534.118                                        | 637.145                                                        | 531.180                                         | 563.170                                        | 513.169                                        | 545.159                                        | 577.149                                        |
| Negative <sup>e</sup>                       |                                                                | $n$ RO <sub>2</sub> $\alpha$                    | $n$ RO <sub>2</sub> $\beta$                     | $n$ RO <sub>2</sub> $\chi$                      | $n$ RO <sub>2</sub> $\delta$                   | $n$ RO <sub>2</sub> $\epsilon$                                 | $on$ RO <sub>2</sub> 1x <sup>f</sup>            |                                                |                                                |                                                |                                                |
|                                             |                                                                | C <sub>10</sub> H <sub>16</sub> NO <sub>5</sub> | C <sub>10</sub> H <sub>16</sub> NO <sub>6</sub> | C <sub>10</sub> H <sub>16</sub> NO <sub>7</sub> | C <sub>7</sub> H <sub>10</sub> NO <sub>7</sub> | C <sub>10</sub> H <sub>15</sub> N <sub>2</sub> O <sub>10</sub> | C <sub>10</sub> H <sub>18</sub> NO <sub>9</sub> |                                                |                                                |                                                |                                                |
| $n$ RO <sub>2</sub> $\alpha$                | C <sub>10</sub> H <sub>16</sub> NO <sub>5</sub>                | *490.204                                        | *506.199                                        | *522.194                                        | *480.147                                       | *583.174                                                       | *556.200                                        |                                                |                                                |                                                |                                                |
| $n$ RO <sub>2</sub> $\beta$                 | C <sub>10</sub> H <sub>16</sub> NO <sub>6</sub>                | *506.199                                        | *522.194                                        | *538.189                                        | 496.142                                        | *599.169                                                       | 572.195                                         |                                                |                                                |                                                |                                                |
| $n$ RO <sub>2</sub> $\chi$                  | C <sub>10</sub> H <sub>16</sub> NO <sub>7</sub>                | *522.194                                        | *538.189                                        | 554.184                                         | 512.137                                        | 615.164                                                        | 588.190                                         |                                                |                                                |                                                |                                                |
| $n$ RO <sub>2</sub> $\delta$                | C <sub>7</sub> H <sub>10</sub> NO <sub>7</sub>                 | *480.147                                        | 496.142                                         | 512.137                                         | 470.090                                        | 573.117                                                        | 546.143                                         |                                                |                                                |                                                |                                                |
| $n$ RO <sub>2</sub> $\epsilon$ <sup>d</sup> | C <sub>10</sub> H <sub>15</sub> N <sub>2</sub> O <sub>10</sub> | *583.174                                        | *599.169                                        | 615.164                                         | 573.117                                        | 676.144                                                        | 649.170                                         |                                                |                                                |                                                |                                                |

<sup>a</sup>As in Figure 10, dimers in pink are observed only in the ‘simulated nighttime’ experiment, and those marked with a \* have moderate-to-high signal (40>S/N). Dimers in blue are observed in both the ‘simulated nighttime’ and  $n$ RO<sub>2</sub> +  $n$ RO<sub>2</sub> experiments, while dimers in black are not observed.  $n$ RO<sub>2</sub>  $\phi$  is omitted as no dimers unique to its chemical formula were observed with moderate-to-high S/N (though some dimers attributed to  $n$ RO<sub>2</sub>  $\delta$  may instead derive from  $n$ RO<sub>2</sub>  $\phi$ ). <sup>b</sup>Positive mode ions are generally sodium clusters (M+Na<sup>+</sup>). <sup>c</sup>This mass corresponds to the parent compound -2HNO<sub>2</sub>, presumably lost during ionization; the sodiated parent mass (451.205) was also observed but with low signal due to a lack of carbonyl groups on this dimer. <sup>d</sup>Dimers of  $n$ RO<sub>2</sub>  $\epsilon$  are observed as the oxidation product (as in Figure 10 in the main text). <sup>e</sup>Negative mode ions are generally nitrate clusters (M+NO<sub>3</sub><sup>-</sup>). <sup>f</sup> $on$ RO<sub>2</sub> (1x) is an oxidation product of  $on$ RO<sub>2</sub> (1) in Figure 10.



## Mechanism S1.

Here we provide the list of new species (with SMILES strings for stable products) and reactions added to the kinetic model in this work. The mechanism accurately simulates measured decay of  $\alpha$ -pinene (Figure 2), production of  $\alpha$ -pinene nitrooxy-hydroperoxide (PNP, Figure 6), production of  $\alpha$ -pinene hydroxy-nitrate (PHN, Figure S2), and concentrations of inorganic species (Figure 2) under the range of experimental conditions, but is not meant to simulate SOA formation or later-generation chemistry. While dimer formation from  $RO_2 + RO_2$  reactions is included to approximate the levels observed in SOA, a complete representation of dimer formation would require more detailed treatment of peroxy radical isomerization as shown in Figure 9. Additional reactions of inorganic species relevant to radical dynamics in the chamber are taken from the JPL Chemical Kinetics and Photochemical Data Evaluation,<sup>2</sup> and the reaction of  $NO_3$  with  $H_2O_2$  (producing  $HO_2$  and  $HNO_3$ ) was added (see Fig. S1). In reaction rates, T denotes temperature (K).

{Species}

APIN =  $\alpha$ -pinene;

{SMILES: C/C1=C/CC2CC1C2(C)C}

APINNO2a = tertiary (major) peroxy radical from APIN +  $NO_3$  +  $O_2$ ;

APINNO2b = secondary (minor) peroxy radical from APIN +  $NO_3$  +  $O_2$ ;

PNP = pinene nitrooxy-hydroperoxide;

{SMILES: CC1(C)C2CC(O[N+](=O)O)C(C)(OO)C1C2 (major)}

{SMILES: CC1(C)C2CC(OO)C(C)(O[N+](=O)O)C1C2 (minor)}

PHN = pinene hydroxy-nitrate;

{SMILES: CC1(C)C2CC(O[N+](=O)O)C(C)(O)C1C2 (major)}

{SMILES: CC1(C)C2CC(O)C(C)(O[N+](=O)O)C1C2 (minor)}

PDN = pinene dinitrate;

{SMILES: CC1(C)C2CC(O[N+](=O)O)C(C)(O[N+](=O)O)C1C2}

PINAL = pinonaldehyde;

{SMILES: CC(=O)C1CC(CC=O)C1(C)C}

DIMER = dimers from  $RO_2 + RO_2$  reactions;

{SMILES: CC3(C)C4CC(O[N+](=O)O)C(OOC1(C)C(O[N+](=O)O)CC2CC1C2(C)C)C3C4 (Fig. 6D.a)}

{SMILES: CC(=O)CC(CC(CC=O)OOC1(C)C(O[N+](=O)O)CC2CC1C2(C)C)O[N+](=O)O (Fig. 6D.b)}

{SMILES: CC(=O)C(CC2CC(OOC1CC(CC(O[N+](=O)O)C(C)=O)C1(C)C)C2(C)C)O[N+](=O)O (Fig. 6D.c)}

{SMILES: CC(=O)C(CC(C(=O)CO[N+](=O)O)C(C)(C)OOC1(C)C(O[N+](=O)O)CC2CC1C2(C)C)O[N+](=O)O (Fig. 6D.d)}

APINO2a = tertiary (major) peroxy radical from APIN + OH +  $O_2$ ;

APINO2b = secondary (minor) peroxy radical from APIN + OH +  $O_2$ ;

APINO2c = peroxy radical from APIN +  $O_3$ ;

APINP = generic product of APINO2 reactions;

{Reactions}

APIN +  $NO_3$  = 0.65 APINNO2a + 0.35 APINNO2b :  $1.2 \times 10^{-12} \times e^{(490/T)}$  ;

APIN +  $O_3$  = 0.16 PINAL + 0.16  $H_2O_2$  + 0.8 OH + 0.8 APINO2c :  $0.48 \times 10^{-15} \times e^{(-550/T)}$  ;

APIN + OH = 0.65 APINO2a + 0.35 APINO2b :  $1.34 \times 10^{-11} \times e^{(410/T)}$  ;

APINNO2a +  $HO_2$  = 0.37 PNP + 0.63 PINAL + 0.63  $HO_2$  + 0.63 OH :  $2.66 \times 10^{-13} \times e^{(1300/T)}$  ;

APINNO2a + NO = 0.3 PDN + 0.7 PINAL + 1.4  $NO_2$  :  $2.55 \times 10^{-12} \times e^{(380/T)}$  ;

APINNO2a +  $NO_3$  = 0.1 PDN + 0.9 PINAL + 1.8  $NO_2$  :  $2.3 \times 10^{-12}$  ;

APINNO2b +  $HO_2$  = PNP :  $2.66 \times 10^{-13} \times e^{(1300/T)}$  ;

APINNO2b + NO = 0.3 PDN + 0.7 PINAL + 1.4  $NO_2$  :  $2.55 \times 10^{-12} \times e^{(380/T)}$  ;

$\text{APINNO2b} + \text{NO}_3 = 0.1 \text{ PDN} + 0.9 \text{ PINAL} + 1.8 \text{ NO}_2 : 2.3 \times 10^{-12} ;$   
 $\text{APINNO2a} + \text{APINNO2a} = 0.16 \text{ DIMER} + 1.68 \text{ PINAL} + 1.68 \text{ NO}_2 : 1 \times 10^{-14} ;$   
 $\text{APINNO2a} + \text{APINNO2b} = 0.34 \text{ PHN} + 0.16 \text{ DIMER} + 1.34 \text{ PINAL} + 1.34 \text{ NO}_2 : 1 \times 10^{-14} ;$   
 $\text{APINNO2b} + \text{APINNO2b} = 0.68 \text{ PHN} + 0.16 \text{ DIMER} + 1.00 \text{ PINAL} + 1.00 \text{ NO}_2 : 1 \times 10^{-14} ;$   
 $\text{APINO2a} + \text{HO}_2 = 0.5 \text{ PINAL} + 0.5 \text{ APINP} + 0.5 \text{ HO}_2 + 0.5 \text{ OH} : 2.66 \times 10^{-13} \times e^{(1300/T)} ;$   
 $\text{APINO2a} + \text{NO} = 0.3 \text{ PHN} + 0.7 \text{ PINAL} + 0.7 \text{ HO}_2 + 0.7 \text{ NO}_2 : 2.55 \times 10^{-12} \times e^{(380/T)} ;$   
 $\text{APINO2a} + \text{NO}_3 = 0.1 \text{ PHN} + 0.9 \text{ PINAL} + 0.9 \text{ HO}_2 + 0.9 \text{ NO}_2 : 2.3 \times 10^{-12} ;$   
 $\text{APINO2b} + \text{HO}_2 = 0.5 \text{ PINAL} + 0.5 \text{ APINP} + 0.5 \text{ HO}_2 + 0.5 \text{ OH} : 2.66 \times 10^{-13} \times e^{(1300/T)} ;$   
 $\text{APINO2b} + \text{NO} = 0.3 \text{ PHN} + 0.7 \text{ PINAL} + 0.7 \text{ HO}_2 + 0.7 \text{ NO}_2 : 2.55 \times 10^{-12} \times e^{(380/T)} ;$   
 $\text{APINO2b} + \text{NO}_3 = 0.1 \text{ PHN} + 0.9 \text{ PINAL} + 0.9 \text{ HO}_2 + 0.9 \text{ NO}_2 : 2.3 \times 10^{-12} ;$   
 $\text{APINO2c} + \text{HO}_2 = \text{APINP} : 2.66 \times 10^{-13} \times e^{(1300/T)} ;$   
 $\text{APINO2c} + \text{NO} = \text{APINP} + 0.7 \text{ NO}_2 : 2.55 \times 10^{-12} \times e^{(380/T)} ;$   
 $\text{APINO2c} + \text{NO}_3 = \text{APINP} : 2.3 \times 10^{-12} ;$   
 $\text{APINNO2a} + \text{APINO2a} = 0.16 \text{ DIMER} + 1.68 \text{ PINAL} + 0.84 \text{ NO}_2 + 0.84 \text{ HO}_2 : 1 \times 10^{-14} ;$   
 $\text{APINNO2a} + \text{APINO2b} = 0.16 \text{ DIMER} + 1.68 \text{ PINAL} + 0.84 \text{ NO}_2 + 0.84 \text{ HO}_2 : 1 \times 10^{-14} ;$   
 $\text{APINNO2a} + \text{APINO2c} = 0.16 \text{ DIMER} + 0.84 \text{ PINAL} + 0.84 \text{ APINP} + 0.84 \text{ NO}_2 +$   
 $0.84 \text{ HO}_2 : 1 \times 10^{-14} ;$   
 $\text{APINNO2b} + \text{APINO2a} = 0.16 \text{ DIMER} + 1.68 \text{ PINAL} + 0.84 \text{ NO}_2 + 0.84 \text{ HO}_2 : 1 \times 10^{-14} ;$   
 $\text{APINNO2b} + \text{APINO2b} = 0.16 \text{ DIMER} + 1.68 \text{ PINAL} + 0.84 \text{ NO}_2 + 0.84 \text{ HO}_2 : 1 \times 10^{-14} ;$   
 $\text{APINNO2b} + \text{APINO2c} = 0.16 \text{ DIMER} + 0.84 \text{ PINAL} + 0.84 \text{ APINP} + 0.84 \text{ NO}_2 +$   
 $0.84 \text{ HO}_2 : 1 \times 10^{-14} ;$   
 $\text{APINO2a} + \text{APINO2a} = 2 \text{ PINAL} + 2 \text{ HO}_2 : 1 \times 10^{-14} ;$   
 $\text{APINO2a} + \text{APINO2b} = 2 \text{ PINAL} + 2 \text{ HO}_2 : 1 \times 10^{-14} ;$   
 $\text{APINO2a} + \text{APINO2c} = \text{PINAL} + \text{HO}_2 + \text{APINP} : 1 \times 10^{-14} ;$   
 $\text{APINO2b} + \text{APINO2b} = 2 \text{ PINAL} + 2 \text{ HO}_2 : 1 \times 10^{-14} ;$   
 $\text{APINO2b} + \text{APINO2c} = \text{PINAL} + \text{HO}_2 + \text{APINP} : 1 \times 10^{-14} ;$   
 $\text{APINO2c} + \text{APINO2c} = 2 \text{ APINP} : 1 \times 10^{-14} ;$

## References:

1. J. P. Burrows, G. S. Tyndall, and G. K. Moortgat: Absorption spectrum of  $\text{NO}_3$  and kinetics of the reactions of  $\text{NO}_3$  with  $\text{NO}_2$ , Cl, and several stable atmospheric species at 298 K. *J. Phys. Chem.*, 89 (22), 4848-4856, DOI: 10.1021/j100268a038, 1985.
2. J. B. Burkholder, S. P. Sander, J. Abbatt, J. R. Barker, C. Cappa, J. D. Crouse, T. S. Dibble, R. E. Huie, C. E. Kolb, M. J. Kurylo, V. L. Orkin, C. J. Percival, D. M. Wilmoth, and P. H. Wine "Chemical Kinetics and Photochemical Data for Use in Atmospheric Studies, Evaluation No. 19," JPL Publication 19-5, Jet Propulsion Laboratory, Pasadena, 2019 <http://jpldataeval.jpl.nasa.gov>
